# Supplementary material
Source: PubMed Central journal article supplement (PMC1440825)
Supplement: 7601057s2.pdf [file 7601057s2.pdf]

## Supplementary Figure 1

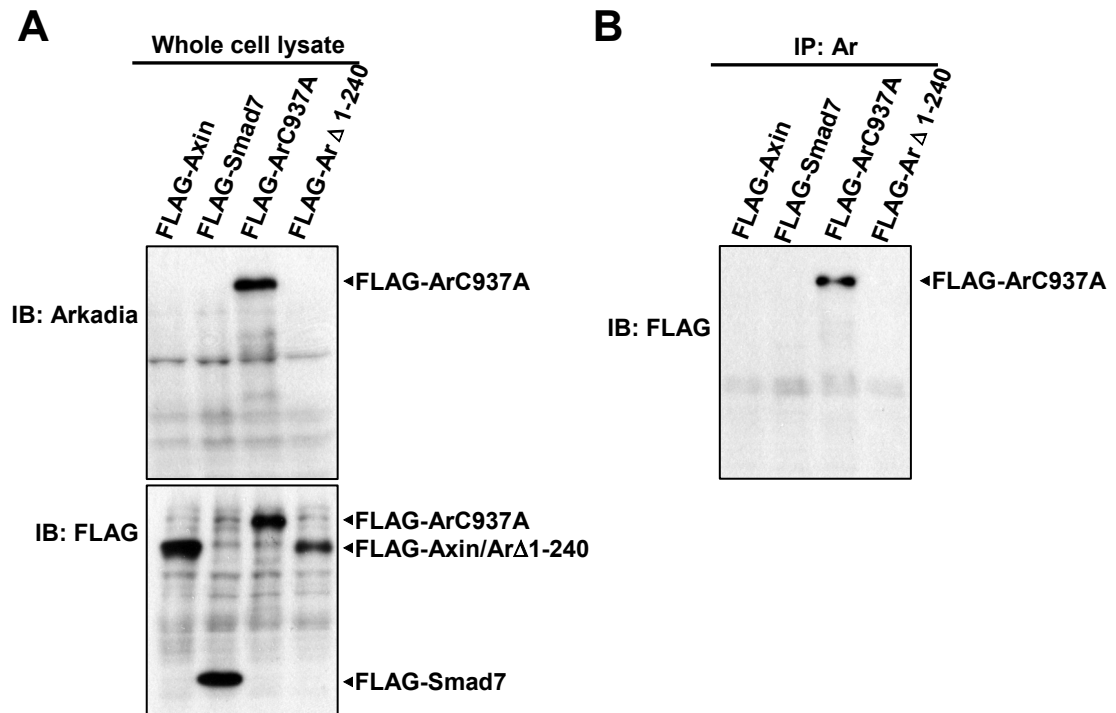

**Figure S1.** Characterization of the anti-Arkadia rabbit polyclonal antibody that was raised against a bacterially expressed GST-fusion protein containing aa1-132 of mouse Arkadia. (A) 293T cells were transfected with FLAG-Axin, FLAG-Smad7, FLAG-ArC937A and FLAG-Ar $\Delta$ 1-240, respectively. Equal volumes of cell lysates were analyzed by western blotting using anti-FLAG to indicate the expression of the transfected proteins (lower panel). When the same samples were probed with the anti-Arkadia polyclonal antibody, only FLAG-tagged full-length Arkadia was detected (upper panel).

(B) 293T cells were transfected as indicated. Cell lysates were subjected to immunoprecipitation with anti-Arkadia, and Flag-tagged protein was detected only in the immunoprecipitates from cells overexpressing Arkadia.
