# Supplementary material
Source: PubMed Central journal article supplement (PMC1440825)
Supplement: 7601057s3.pdf [file 7601057s3.pdf]

## Supplementary Figure 2

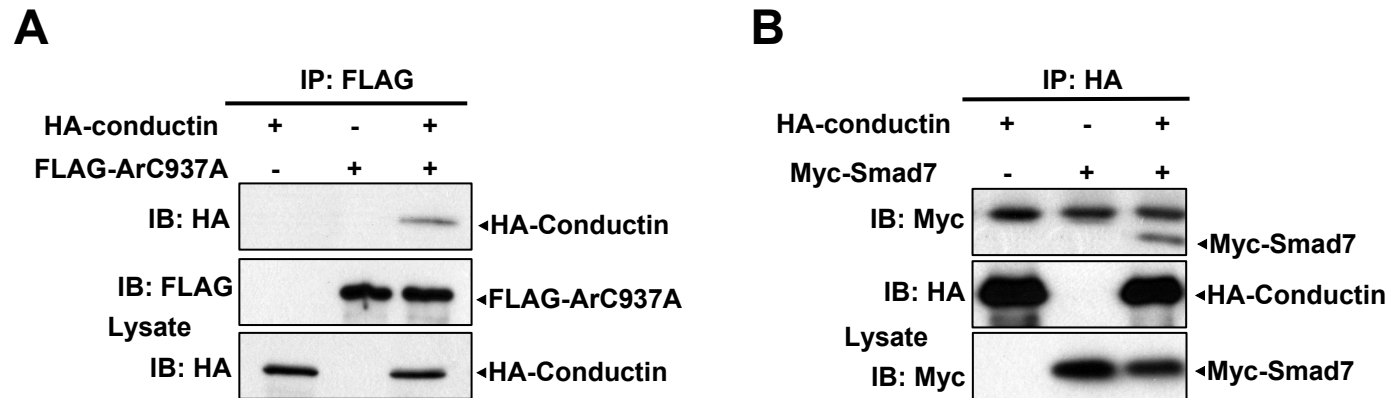

**Figure S2.** Interaction of Axin2/Conductin with Arkadia and Smad7.

(A) HA-Conductin and FLAG-ArC937A were separately transfected into 293T cells and immunoprecipitation was performed with anti-FLAG antibody. HA-Conductin was detected in the Arkadia immunoprecipitate by western blotting with anti-HA antibody.

(B) 293T cells were transfected as indicated and subjected to immunoprecipitation with anti-HA antibody. Immunoblotting of the precipitates with anti-Myc antibody shows that Smad7 can be detected in the Conductin immunoprecipitate.
